# Supplementary material
Source: PubMed Central journal article supplement (PMC4248022)
Supplement: NIHMS636410-supplement-Supp_Data.pdf [file NIHMS636410-supplement-Supp_Data.pdf]

**Web-based Supplementary Materials for “Combining Biomarkers to Optimize  
Patient Treatment Recommendations”**

**by Chaeryon Kang, Holly Janes, and Ying Huang**

Vaccine and Infectious Disease Division and Public Health Sciences Division,  
Fred Hutchinson Cancer Research Center, Seattle, WA 98109, U.S.A

## Web Appendix A. Choice of tuning parameters

### A-1. Choice of the maximum number of iterations, $M_{max}$ , and weight, $\tilde{w}\{\Delta(Y)\}$

There are two tuning parameters that need specification when implementing the boosting method: the weight function,  $\tilde{w}\{\Delta(Y)\}$ , and the maximum number of iterations,  $M_{max}$ . Choosing  $M_{max}$  is similar to choosing the number of base-models in any ensemble method that combines multiple base-models (Opitz and Maclin (1999); Assareh et al. (2008)). Typically a larger number of base-models yields improved model performance, up until some  $M_0$  beyond which no improvement and potentially even deterioration in performance is observed. The best weight function and optimal  $M_{max}$  are not known in practice, and so we recommend investigating these choices using a separate data set that is not used for fitting or evaluating model performance, or using cross-validation (CV).

*A-1-1. Impact of choice of  $M_{max}$  and  $\tilde{w}\{\Delta(Y)\}$  in simulations.* In our simulation study, we set  $\tilde{w}\{\Delta(Y)\} = |\Delta(Y)|^{-\frac{1}{3}}$  which was the best-performing weight function among several for the models we considered in the sense of maximum mean  $\theta$  across 1000 training data sets. In addition to  $\tilde{w}\{\Delta(Y)\} = |\Delta(Y)|^{-\frac{1}{3}}$ , we considered  $\tilde{w}\{\Delta(Y)\} = |\Delta(Y)|^{-\frac{1}{10}}$ ,  $\tilde{w}\{\Delta(Y)\} = e^{-|\Delta(Y)|}$  and  $\tilde{w}\{\Delta(Y), Y\} = e^{-|\Delta(Y)|}W_A(Y)$ , where  $W_A(Y)$  is similar to the weight function used in Adaboost (Friedman et al., 2000). Specifically,  $W_A(Y) = \exp\left\{-\frac{1}{2} \log\left(\frac{1 - err}{err}\right) \times (2D - 1)(2\widehat{D} - 1)\right\}$ , where  $\widehat{D} = \mathbf{1}\{\widehat{P}(D = 1|T, Y) > 0.5\}$  is the outcome classification at the previous stage and  $err = P(D \neq \widehat{D})$  is the error in this classification. Additional polynomial weight functions of the form  $\tilde{w}\{\Delta(Y)\} = |\Delta(Y)|^d$  were also considered (data not shown). Web Table 1 compares the performance of the boosting method under different choices for the weight function for the 4 most informative simulation scenarios. The results suggest that the best-performing weight function depends on simulation scenario and working model. However, the improvement in model performance associated with using the optimal  $\tilde{w}\{\Delta(Y)\}$  was minimal.

In the simulations,  $M_{\text{Best}}$  is what we found to be the best-performing  $M_{\text{max}}$  among  $M_{\text{max}} = 1, \dots, 50$ , in terms of maximizing mean  $\theta$  across 1000 training data sets for each  $M_{\text{max}}$ . Web Figures 1, 2, 3 and 4 show that for most simulation scenarios with  $n = 500$  observations,  $M_{\text{max}} = 10 \sim 20$  yields near-optimal mean  $\theta$  and  $M_{\text{max}} = 40 \sim 50$  achieves optimal mean  $\theta$ . However, as with choice of the weight function, the improvement in model performance associated with using the optimal  $M_{\text{max}}$  is minimal (Web Table 1). These figures also show that  $M_{\text{Best}}$  was also near-optimal in terms of minimizing  $\text{MCR}_{\text{TB}}$ .

*A-1-2. Choosing  $M_{\text{max}}$  and  $\tilde{w}\{\Delta(Y)\}$  in practice using cross-validation.* In practice, to determine the maximum number of iterations,  $M_{\text{max}}$ , and the best weight function,  $\tilde{w}\{\Delta(Y)\}$ , we recommend K-fold cross-validation. We start with a collection of reasonable  $M_{\text{max}}$ , for example,  $\widetilde{M}^{(1)} = \{10, 50, 100, 300, 500\}$ . Using  $K - 1/K$  of the data, we apply the boosting method with each of  $M_{\text{max}} \in \widetilde{M}$ , and estimate  $\theta$  using the remaining hold-out data. We calculate  $\widehat{\theta}$  as the average estimated  $\theta$  over K hold-out data sets. This entire procedure is then repeated  $J$  times, where we use  $J = 10$ . Let  $M_{\text{max}}^{(1)} = \arg \max_{\widetilde{M}^{(1)}} \widehat{\theta}$ . In the second stage, we refine  $\widetilde{M}^{(1)}$  further using a finer grid of possible  $M_{\text{max}}$  values. For example, if  $M_{\text{max}}^{(1)} = 150$ , then  $\widetilde{M}^{(2)} = \{100, \dots, 130, 140, 150, 160, \dots, 200\}$  and  $\widehat{\theta}$  is calculated for each element of  $\widetilde{M}^{(2)}$ . The third stage refines  $\widetilde{M}^{(2)}$  even further. In our analysis, we have found that 3-stages for refining  $\widetilde{M}$  has been sufficient and define the best  $M_{\text{max}}$  as  $M_{\text{max}}^{(3)} = \arg \max_{\widetilde{M}^{(3)}} \widehat{\theta}$ . In general, we recommend continuing to refine  $\widetilde{M}$  until the variation in  $\widehat{\theta}$  over  $\widetilde{M}$  is minimal.

We recommend a similar CV procedure to determine the best weight function,  $\tilde{w}\{\Delta(Y)\}$ , given a set of possible weight functions. Alternatively, one could conduct a single CV analysis, simultaneously optimizing the choice of  $M_{\text{max}}$  and  $\tilde{w}\{\Delta(Y)\}$ , using a grid search method. This is what we used for the breast cancer data analysis; the procedure is described in detail

below.

[Web Table 1 about here.]

[Web Figure 1 about here.]

[Web Figure 2 about here.]

[Web Figure 3 about here.]

[Web Figure 4 about here.]

*A-1-3. Application of the CV procedure to the breast cancer data.* In the breast cancer data analysis, the best weight function and the maximum number of iterations were determined using 10 replications of 5-fold CV. We considered weight functions of the form  $\tilde{w}\{\Delta(Y)\} = |\Delta(Y)|^d$ , where  $d \in \tilde{D}^{(1)} = \{-1.85, -1.6, -1.35, -1.1, -0.85, -0.6, -0.35, -0.1\}$ . The best  $d$  and  $M_{\max}$  were explored using a grid search. In the first stage, we applied the boosting method for each element of  $\widetilde{DM}^{(1)} = \{(d, M_{\max}) : d \in \tilde{D}^{(1)}, M_{\max} \in \widetilde{M}^{(1)}\}$  to obtain  $DM_{\max}^{(1)} = \arg \max_{\widetilde{DM}^{(1)}} \hat{\theta}$ . In the second stage, we refined  $\widetilde{DM}^{(1)}$  and performed another grid search yielding  $DM_{\max}^{(2)} = \arg \max_{\widetilde{DM}^{(2)}} \hat{\theta}$ . We further refined  $\widetilde{DM}^{(2)}$  and performed a third grid search to obtain the best  $(d, M_{\max}) = DM_{\max}^{(3)} = \arg \max_{\widetilde{DM}^{(3)}} \hat{\theta}$ . The resultant best weight function and maximum number of iterations are given in Web Table 2.

[Web Table 2 about here.]

*A-2. Influence of the choice of maximum weight,  $C_M$*

In our simulations and data analysis we used a “weight trimming” strategy that truncates weights  $\tilde{w}\{\tilde{\Delta}(Y_i)\}$  for subject  $i$  at a maximum weight,  $C_M = 500$ . Weight trimming avoids highly variable estimators that result when subjects with  $\tilde{\Delta}(Y_i) \approx 0$  receive enormous weight; this strategy is commonly employed for inverse-probability weighted estimation (Potter

(1993); Cole and Hernán (2008); Lee et al. (2011)). However, under a correctly specified working model, weight trimming can reduce variance of estimation at the cost of increased bias (Cole and Hernán, 2008).

Web Table 3 shows the simulation results for the boosting method using different choices for the maximum weight;  $C_M$  is varied from 300 to 1000. Selected simulation scenarios with  $n = 500$  observations are examined, and the linear logistic working model is used. We observe that neither the mean  $\theta$  or mean  $MCR_{TB}$  across 1000 training data sets is sensitive to the choice of  $C_M$  and therefore fixing  $C_M = 500$  appears reasonable.

[Web Table 3 about here.]

### Web Appendix B. Bias-correction by bootstrap and double-bootstrap sampling

In the breast cancer data analysis, we used the bootstrap bias correction approach (Efron and Tibshirani, 1993). Briefly, given the apparent  $\hat{\theta}$  obtained using the original (training) data set, bootstrap bias estimate is  $\widehat{Bias}_b(\hat{\theta}) = \hat{\theta} - B^{-1} \sum_{b=1}^B \hat{\theta}_b$ , where  $\hat{\theta}_b$  is the estimate of  $\theta$  in the original training data given  $\hat{\phi}_b$  estimated using bootstrap sample  $b$  and  $B$  denotes the number of bootstrap replications. Then the bootstrap bias-corrected estimate of  $\theta$  is calculated as  $\hat{\theta}_c = \hat{\theta} - \widehat{Bias}_b(\hat{\theta})$ .

We used a double-bootstrap procedure to calculate a 95% confidence interval for the bootstrap-bias corrected estimate of  $\theta$ . Specifically, we bootstrapped from the data 300 times. In each bootstrap sample, we (double) bootstrapped 100 times and calculated the bootstrap bias-corrected estimate of  $\theta$ . Percentiles of the bootstrap distribution of bias-corrected estimates were used to form the confidence interval.

## REFERENCES

- Assareh, A., Moradi, M., and Volkert, L. (2008). A hybrid random subspace classifier fusion approach for protein mass spectra classification. *Evolutionary Computation, Machine Learning and Data Mining in Bioinformatics* pages 1–11.
- Cole, S. and Hernán, M. (2008). Constructing inverse probability weights for marginal structural models. *American Journal of Epidemiology* **168**, 656–664.
- Efron, B. and Tibshirani, R. (1993). *An Introduction to the Bootstrap*, volume 57. CRC press.
- Friedman, J., Hastie, T., and Tibshirani, R. (2000). Additive logistic regression: a statistical view of boosting (with discussion and a rejoinder by the authors). *Annals of Statistics* **28**, 337–407.
- Lee, B., Lessler, J., and Stuart, E. (2011). Weight trimming and propensity score weighting. *Plos One* **6**, e18174.
- Opitz, D. and Maclin, R. (1999). Popular ensemble methods: An empirical study. *Journal of Artificial Intelligence Research* **11**, 169–198.
- Potter, F. (1993). The effect of weight trimming on nonlinear survey estimates. In *Proceedings of the American Statistical Association, Section on Survey Research Methods*, pages 758–763.

*Received October 0000. Revised February 0000. Accepted March 0000.*

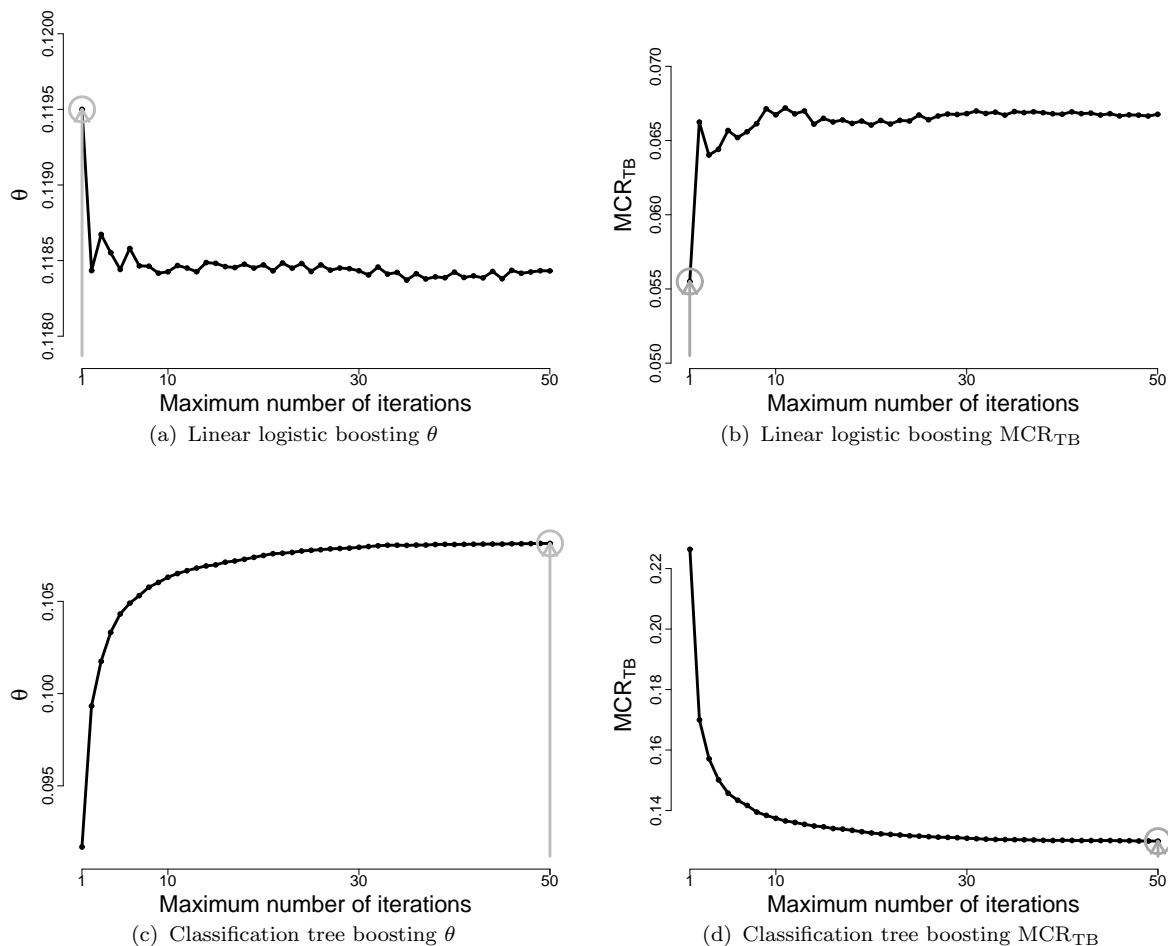

**Figure 1.** Scenario 1 simulation results for the boosting method using different maximum number of iterations,  $M_{\max}$ . Performance of marker combinations obtained using the following methods are compared: the boosting method described in Section 2.3 with linear logistic working model and the boosting method with classification tree working model. Mean  $\theta$  and mean misclassification rate for treatment benefit ( $MCR_{TB}$ ) in a large independent test data set over 1000 training data sets ( $n = 500$ ) are shown for  $M_{\max} = 1, \dots, 50$ . The  $M_{\max} \leq 50$  achieving the highest  $\theta$  is indicated (grey arrow). The pre-specified convergence criterion for the logistic regression working model is  $\|\tilde{\beta}^{(k)} - \tilde{\beta}^{(k-1)}\| \leq 10^{-7}$ , where  $\tilde{\beta}^{(k)}$  is the vector of estimated regression coefficients at the  $k^{th}$  iteration, or reaching  $M_{\max}$ . For the non-parametric classification tree working model, the criterion is reaching  $M_{\max}$ .

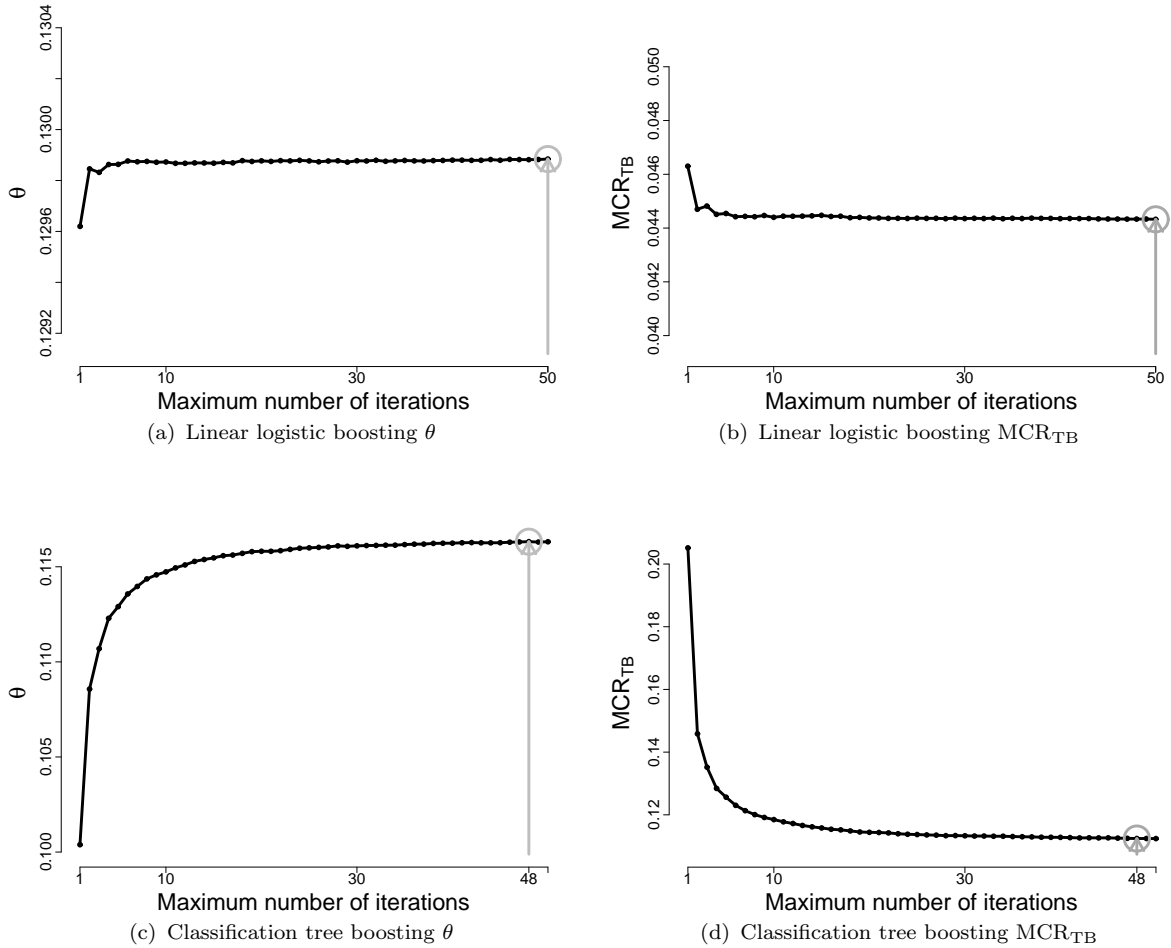

**Figure 2.** Scenario 3 simulation results for the boosting method using different maximum number of iterations,  $M_{\max}$ . Performance of marker combinations obtained using the following methods are compared: the boosting method described in Section 2.3 with linear logistic working model and the boosting method with classification tree working model. Mean  $\theta$  and mean misclassification rate for treatment benefit ( $MCR_{TB}$ ) in a large independent test data set over 1000 training data sets ( $n = 500$ ) are shown for  $M_{\max} = 1, \dots, 50$ . The  $M_{\max} \leq 50$  achieving the highest  $\theta$  is indicated (grey arrow). The pre-specified convergence criterion for the logistic regression working model is  $\|\tilde{\beta}^{(k)} - \tilde{\beta}^{(k-1)}\| \leq 10^{-7}$ , where  $\tilde{\beta}^{(k)}$  is the vector of estimated regression coefficients at the  $k^{th}$  iteration, or reaching  $M_{\max}$ . For the non-parametric classification tree working model, the criterion is reaching  $M_{\max}$ .



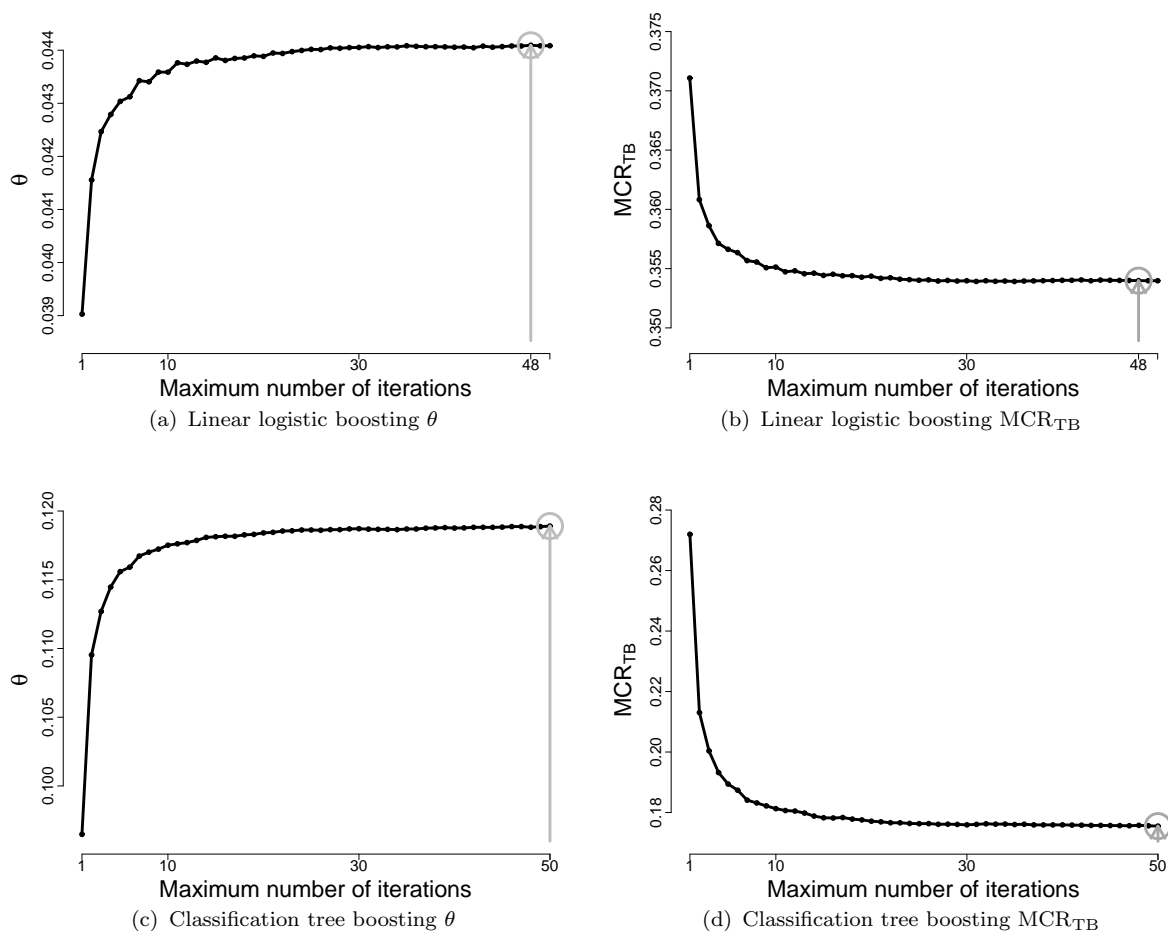

**Figure 3.** Scenario 6 simulation results for the boosting method using different maximum number of iterations,  $M_{\max}$ . Performance of marker combinations obtained using the following methods are compared: the boosting method described in Section 2.3 with linear logistic working model and the boosting method with classification tree working model. Mean  $\theta$  and mean misclassification rate for treatment benefit ( $MCR_{TB}$ ) in a large independent test data set over 1000 training data sets ( $n = 500$ ) are shown for  $M_{\max} = 1, \dots, 50$ . The  $M_{\max} \leq 50$  achieving the highest  $\theta$  is indicated (grey arrow). The pre-specified convergence criterion for the logistic regression working model is  $\|\tilde{\beta}^{(k)} - \tilde{\beta}^{(k-1)}\| \leq 10^{-7}$ , where  $\tilde{\beta}^{(k)}$  is the vector of estimated regression coefficients at the  $k^{th}$  iteration, or reaching  $M_{\max}$ . For the non-parametric classification tree working model, the criterion is reaching  $M_{\max}$ .

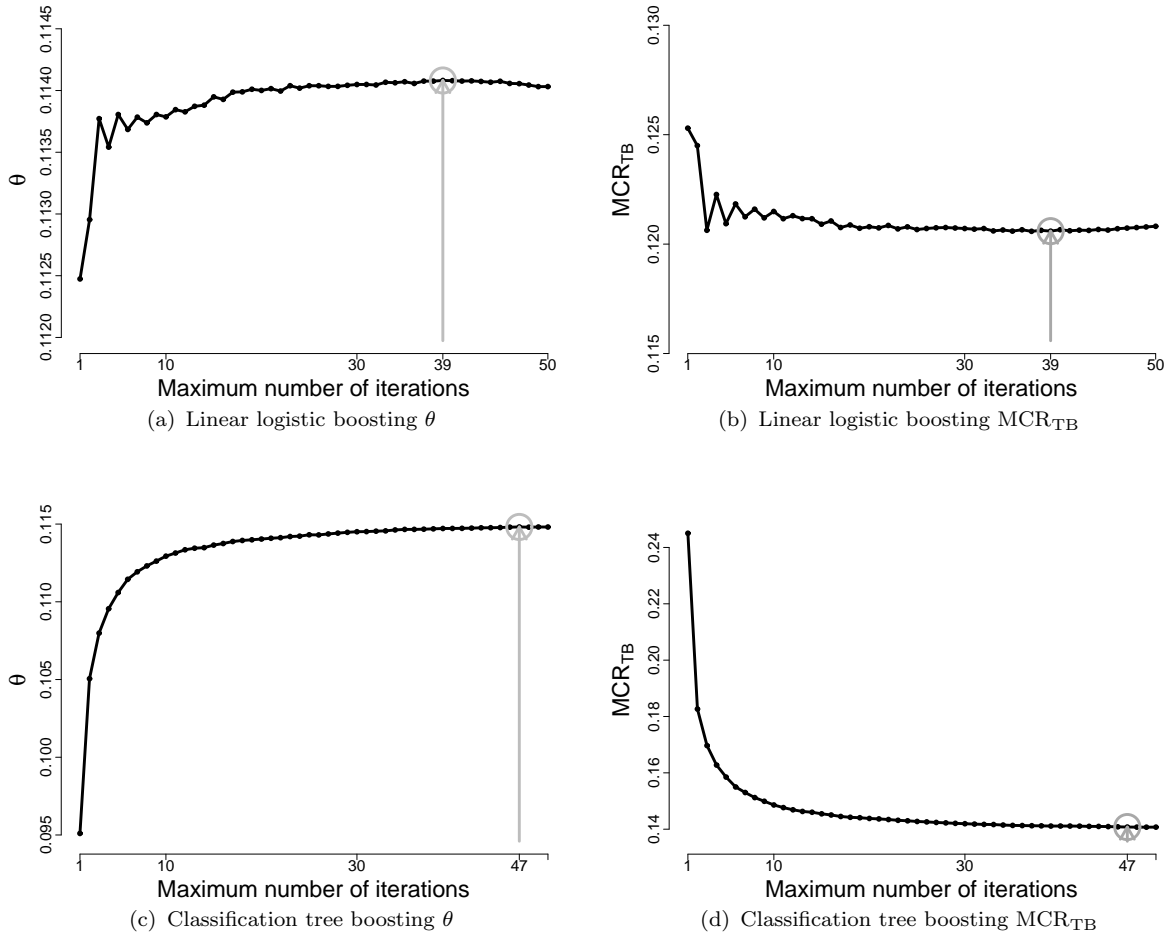

**Figure 4.** Scenario 7 simulation results for the boosting method using different maximum number of iterations,  $M_{\max}$ . Performance of marker combinations obtained using the following methods are compared: the boosting method described in Section 2.3 with linear logistic working model and the boosting method with classification tree working model. Mean  $\theta$  and mean misclassification rate for treatment benefit ( $MCR_{TB}$ ) in a large independent test data set over 1000 training data sets ( $n = 500$ ) are shown for  $M_{\max} = 1, \dots, 50$ . The  $M_{\max} \leq 50$  achieving the highest  $\theta$  is indicated (grey arrow). The pre-specified convergence criterion for the logistic regression working model is  $\|\tilde{\beta}^{(k)} - \tilde{\beta}^{(k-1)}\| \leq 10^{-7}$ , where  $\tilde{\beta}^{(k)}$  is the vector of estimated regression coefficients at the  $k^{th}$  iteration, or reaching  $M_{\max}$ . For the non-parametric classification tree working model, the criterion is reaching  $M_{\max}$ .

**Table 1** Simulation results for the boosting method using different weight functions,  $\tilde{w}\{\Delta(Y)\}$ , and different maximum iteration parameters,  $M_{max}$ , with  $n = 500$  observations. Simulation scenarios 1, 3, 6, and 7 are shown. Performance of marker combinations obtained using the following methods are compared: the boosting method described in Section 2.3 with linear logistic working model and the boosting method with classification tree working model. Mean and Monte Carlo standard deviation (SD) of  $\theta$  are shown, along with the mean misclassification rate for treatment benefit (MCR<sub>TRB</sub>). The  $M_{max} \leq 50$  achieving the highest mean  $\theta$  ( $M_{Best}$ ) is reported for the weight function  $\tilde{w}\{\Delta(Y)\} = |\Delta(Y)|^{-\frac{1}{3}}$ .

| Scenario           | Weight $\tilde{w}$<br>maximum # of<br>iterations | Linear logistic boosting     |                    |                    |                    |                    | Classification tree boosting |            |        |        |        |        |        |  |  |  |  |  |  |  |
|--------------------|--------------------------------------------------|------------------------------|--------------------|--------------------|--------------------|--------------------|------------------------------|------------|--------|--------|--------|--------|--------|--|--|--|--|--|--|--|
|                    |                                                  | $ \Delta(Y) ^{-\frac{1}{3}}$ | $M_{Best}$         | 500                | 500                | 500                | $ \Delta(Y) ^{-\frac{1}{3}}$ | $M_{Best}$ | 500    | 500    | 500    |        |        |  |  |  |  |  |  |  |
|                    |                                                  | $e^{- \Delta(Y) }$           | $e^{- \Delta(Y) }$ | $e^{- \Delta(Y) }$ | $e^{- \Delta(Y) }$ | $e^{- \Delta(Y) }$ | $ \Delta(Y) ^{-\frac{1}{3}}$ | $M_{Best}$ | 500    | 500    | 500    |        |        |  |  |  |  |  |  |  |
| 1                  | Optimal $M=M_{Best}$                             |                              | 1                  |                    |                    |                    | 50                           |            |        |        |        |        |        |  |  |  |  |  |  |  |
|                    | $\theta$                                         | Mean                         | 0.1195             | 0.1195             | 0.1199             | 0.1199             | 0.1199                       | 0.1198     | 0.1083 | 0.1081 | 0.1009 | 0.0968 | 0.1023 |  |  |  |  |  |  |  |
|                    | SD                                               | 0.0026                       | 0.0026             | 0.0022             | 0.0023             | 0.0023             | 0.0023                       | 0.0023     | 0.0065 | 0.0066 | 0.0107 | 0.0115 | 0.0098 |  |  |  |  |  |  |  |
| MCR <sub>TRB</sub> | Mean                                             | 0.0555                       | 0.0555             | 0.0521             | 0.0530             | 0.0524             | 0.0524                       | 0.1294     | 0.1299 | 0.1815 | 0.1701 | 0.1682 |        |  |  |  |  |  |  |  |
| 3                  | Optimal $M=M_{Best}$                             |                              | 50                 |                    |                    |                    | 48                           |            |        |        |        |        |        |  |  |  |  |  |  |  |
|                    | $\theta$                                         | Mean                         | 0.1299             | 0.1299             | 0.1301             | 0.1305             | 0.1301                       | 0.1301     | 0.1162 | 0.1163 | 0.1095 | 0.0929 | 0.0977 |  |  |  |  |  |  |  |
|                    | SD                                               | 0.0022                       | 0.0022             | 0.0020             | 0.0018             | 0.0021             | 0.0021                       | 0.0021     | 0.0065 | 0.0062 | 0.0095 | 0.0393 | 0.0378 |  |  |  |  |  |  |  |
| MCR <sub>TRB</sub> | Mean                                             | 0.0444                       | 0.0443             | 0.0420             | 0.0383             | 0.0423             | 0.0423                       | 0.1124     | 0.1124 | 0.1596 | 0.1731 | 0.1618 |        |  |  |  |  |  |  |  |
| 6                  | Optimal $M=M_{Best}$                             |                              | 48                 |                    |                    |                    | 50                           |            |        |        |        |        |        |  |  |  |  |  |  |  |
|                    | $\theta$                                         | Mean                         | 0.0438             | 0.0441             | 0.0310             | 0.0234             | 0.0310                       | 0.0310     | 0.1186 | 0.1189 | 0.1064 | 0.1060 | 0.1040 |  |  |  |  |  |  |  |
|                    | SD                                               | 0.0128                       | 0.0122             | 0.0172             | 0.0191             | 0.0172             | 0.0172                       | 0.0172     | 0.0106 | 0.0101 | 0.0167 | 0.0232 | 0.0101 |  |  |  |  |  |  |  |
| MCR <sub>TRB</sub> | Mean                                             | 0.3542                       | 0.3540             | 0.3739             | 0.3855             | 0.3739             | 0.3739                       | 0.1762     | 0.1755 | 0.2242 | 0.2119 | 0.2179 |        |  |  |  |  |  |  |  |
| 7                  | Optimal $M=M_{Best}$                             |                              | 39                 |                    |                    |                    | 47                           |            |        |        |        |        |        |  |  |  |  |  |  |  |
|                    | $\theta$                                         | Mean                         | 0.1140             | 0.1141             | 0.1002             | 0.0963             | 0.1066                       | 0.1066     | 0.1151 | 0.1148 | 0.1089 | 0.1049 | 0.0962 |  |  |  |  |  |  |  |
|                    | SD                                               | 0.0118                       | 0.0117             | 0.0201             | 0.0241             | 0.0185             | 0.0185                       | 0.0185     | 0.0094 | 0.0094 | 0.0137 | 0.0139 | 0.0347 |  |  |  |  |  |  |  |
| MCR <sub>TRB</sub> | Mean                                             | 0.1207                       | 0.1206             | 0.1752             | 0.1879             | 0.1506             | 0.1506                       | 0.1394     | 0.1408 | 0.1851 | 0.1830 | 0.2010 |        |  |  |  |  |  |  |  |

$$W_A(Y) = \exp\left\{-\frac{1}{2} \log\left(\frac{1-err}{err}\right)\right\} \times (2D-1)(2\hat{D}-1), \text{ where}$$

$$D \text{ denotes the binary outcome (0 or 1), } \hat{D} = \mathbf{1}\{\hat{P}(D=1|T, Y) > 0.5\} \text{ denotes the predicted outcome in the previous stage, and } err = P(D \neq \hat{D}).$$

**Table 2**

The best weight function and the maximum number of iterations for the boosting method in the breast cancer data. Models including the modified risk score (MRS); genes  $G_1, G_2$  and  $G_3$ ; and genes  $G_4, G_5$  and  $G_4 \times G_5$  are shown. Weight functions of the form  $\tilde{w}\{\Delta(Y)\} = |\Delta(Y)|^d$  were considered. The best weight function and the maximum number of iterations are determined based on the average  $\theta$  over 10 replications of 5-fold cross-validation.

| Marker set (Y)               | Working model | Linear logistic                        |                                | Classification tree with interactions  |                                |
|------------------------------|---------------|----------------------------------------|--------------------------------|----------------------------------------|--------------------------------|
|                              |               | $d$ in                                 | Maximum                        | $d$ in                                 | Maximum                        |
|                              |               | $\tilde{w}(\Delta(Y)) =  \Delta(Y) ^d$ | # of iterations ( $M_{\max}$ ) | $\tilde{w}(\Delta(Y)) =  \Delta(Y) ^d$ | # of iterations ( $M_{\max}$ ) |
| MRS                          |               | -1.83                                  | 100                            | -0.82                                  | 15                             |
| $(G_1, G_2, G_3)$            |               | -0.33                                  | 270                            | -0.14                                  | 20                             |
| $(G_4, G_5, G_4 \times G_5)$ |               | -1.85                                  | 150                            | -1.85                                  | 250                            |

**Table 3**

Simulation results for the boosting method using different choices for the maximum weight,  $C_M$ . Simulation scenarios 1, 3, 6, and 7 with 500 observations are examined. The boosting method described in Section 2.3 is applied with linear logistic working model,  $\tilde{w}\{\Delta(Y)\} = |\Delta(Y)|^{-\frac{1}{3}}$ , and  $M_{max} = 500$ . Mean  $\theta$  and mean misclassification rate for treatment benefit ( $MCR_{TB}$ ) in a large independent test data set across 1000 training data sets are shown.

|            |            | Maximum weight ( $C_M$ ) |         |         |
|------------|------------|--------------------------|---------|---------|
|            |            | 300                      | 500     | 1000    |
| Scenario 1 | $\theta$   | 0.11949                  | 0.11949 | 0.11949 |
|            | $MCR_{TB}$ | 0.05557                  | 0.05552 | 0.05557 |
| Scenario 3 | $\theta$   | 0.12988                  | 0.12988 | 0.12988 |
|            | $MCR_{TB}$ | 0.04437                  | 0.04436 | 0.04436 |
| Scenario 6 | $\theta$   | 0.04383                  | 0.04384 | 0.04384 |
|            | $MCR_{TB}$ | 0.35423                  | 0.35418 | 0.35419 |
| Scenario 7 | $\theta$   | 0.11408                  | 0.11405 | 0.11408 |
|            | $MCR_{TB}$ | 0.12060                  | 0.12071 | 0.12059 |
